# Supplementary material
Source: PubMed Central journal article supplement (PMC8176137)
Supplement: mmc2.pdf [file mmc2.pdf]

EPI\_ISL\_790331, EPI\_ISL\_790332, EPI\_ISL\_790333, EPI\_ISL\_790334, EPI\_ISL\_790335, EPI\_ISL\_790336, EPI\_ISL\_790337, EPI\_ISL\_790338, EPI\_ISL\_790339, EPI\_ISL\_790340, EPI\_ISL\_790341, EPI\_ISL\_790342, EPI\_ISL\_790343, EPI\_ISL\_790344, EPI\_ISL\_790345, EPI\_ISL\_790346, EPI\_ISL\_790347, EPI\_ISL\_790348, EPI\_ISL\_790349, EPI\_ISL\_790350, EPI\_ISL\_790351, EPI\_ISL\_790352, EPI\_ISL\_790353, EPI\_ISL\_790354, EPI\_ISL\_790355, EPI\_ISL\_790356, EPI\_ISL\_790357, EPI\_ISL\_790358, EPI\_ISL\_790359, EPI\_ISL\_790360, EPI\_ISL\_790361, EPI\_ISL\_790362, EPI\_ISL\_790363, EPI\_ISL\_790364, EPI\_ISL\_790365, EPI\_ISL\_790366, EPI\_ISL\_790367, EPI\_ISL\_790368, EPI\_ISL\_790369, EPI\_ISL\_790370, EPI\_ISL\_790371, EPI\_ISL\_790372, EPI\_ISL\_790373, EPI\_ISL\_790374, EPI\_ISL\_790375, EPI\_ISL\_790376, EPI\_ISL\_790377, EPI\_ISL\_790378, EPI\_ISL\_790379, EPI\_ISL\_790380, EPI\_ISL\_790381, EPI\_ISL\_790382, EPI\_ISL\_790383, EPI\_ISL\_790384, EPI\_ISL\_790385, EPI\_ISL\_790386, EPI\_ISL\_790387, EPI\_ISL\_790388, EPI\_ISL\_790389, EPI\_ISL\_790390, EPI\_ISL\_790391, EPI\_ISL\_790392, EPI\_ISL\_790393, EPI\_ISL\_790394, EPI\_ISL\_790395, EPI\_ISL\_790396, EPI\_ISL\_790397, EPI\_ISL\_790398, EPI\_ISL\_790399, EPI\_ISL\_790400, EPI\_ISL\_790401, EPI\_ISL\_790402, EPI\_ISL\_790403, EPI\_ISL\_790404, EPI\_ISL\_790405, EPI\_ISL\_790406, EPI\_ISL\_790407, EPI\_ISL\_790408, EPI\_ISL\_790409, EPI\_ISL\_790410, EPI\_ISL\_790411, EPI\_ISL\_790412, EPI\_ISL\_790413, EPI\_ISL\_790414, EPI\_ISL\_790415, EPI\_ISL\_790416, EPI\_ISL\_790417, EPI\_ISL\_790418, EPI\_ISL\_790419, EPI\_ISL\_790420, EPI\_ISL\_790421, EPI\_ISL\_790422, EPI\_ISL\_790423, EPI\_ISL\_790424, EPI\_ISL\_790425, EPI\_ISL\_790426, EPI\_ISL\_790427, EPI\_ISL\_790428, EPI\_ISL\_790429, EPI\_ISL\_790430, EPI\_ISL\_790431, EPI\_ISL\_790432, EPI\_ISL\_790433, EPI\_ISL\_790434, EPI\_ISL\_790435, EPI\_ISL\_790436, EPI\_ISL\_790437, EPI\_ISL\_790438, EPI\_ISL\_790439, EPI\_ISL\_790440, EPI\_ISL\_790441, EPI\_ISL\_790442, EPI\_ISL\_790443, EPI\_ISL\_790444, EPI\_ISL\_790445, EPI\_ISL\_790446, EPI\_ISL\_790447, EPI\_ISL\_790448, EPI\_ISL\_790449, EPI\_ISL\_790450, EPI\_ISL\_790451, EPI\_ISL\_790452, EPI\_ISL\_790453, EPI\_ISL\_790454, EPI\_ISL\_790455, EPI\_ISL\_790456, EPI\_ISL\_790457, EPI\_ISL\_790458, EPI\_ISL\_790459, EPI\_ISL\_790460, EPI\_ISL\_790461, EPI\_ISL\_790462, EPI\_ISL\_790463, EPI\_ISL\_790464, EPI\_ISL\_790465, EPI\_ISL\_790466, EPI\_ISL\_790467, EPI\_ISL\_790468, EPI\_ISL\_790469, EPI\_ISL\_790470, EPI\_ISL\_790471, EPI\_ISL\_790472, EPI\_ISL\_790473, EPI\_ISL\_790474, EPI\_ISL\_790475, EPI\_ISL\_790476, EPI\_ISL\_790477, EPI\_ISL\_790478, EPI\_ISL\_790479, EPI\_ISL\_790480, EPI\_ISL\_790481, EPI\_ISL\_790482, EPI\_ISL\_790483, EPI\_ISL\_790484, EPI\_ISL\_790485, EPI\_ISL\_790486, EPI\_ISL\_790487, EPI\_ISL\_790488, EPI\_ISL\_790489, EPI\_ISL\_790490, EPI\_ISL\_790491, EPI\_ISL\_790492, EPI\_ISL\_790493, EPI\_ISL\_790494, EPI\_ISL\_790495, EPI\_ISL\_790496, EPI\_ISL\_790497, EPI\_ISL\_790498, EPI\_ISL\_790499, EPI\_ISL\_790500, EPI\_ISL\_790501, EPI\_ISL\_790502, EPI\_ISL\_790503, EPI\_ISL\_790504, EPI\_ISL\_790505, EPI\_ISL\_790506, EPI\_ISL\_790507, EPI\_ISL\_790508, EPI\_ISL\_790509, EPI\_ISL\_790510, EPI\_ISL\_790511, EPI\_ISL\_790512, EPI\_ISL\_790513, EPI\_ISL\_790514, EPI\_ISL\_790515, EPI\_ISL\_790516, EPI\_ISL\_790517, EPI\_ISL\_790518, EPI\_ISL\_790519, EPI\_ISL\_790520, EPI\_ISL\_790521, EPI\_ISL\_790522, EPI\_ISL\_790523, EPI\_ISL\_790524, EPI\_ISL\_790525, EPI\_ISL\_790526, EPI\_ISL\_790527, EPI\_ISL\_790528, EPI\_ISL\_790529, EPI\_ISL\_790530, EPI\_ISL\_790531, EPI\_ISL\_790532, EPI\_ISL\_790533, EPI\_ISL\_790534, EPI\_ISL\_790535, EPI\_ISL\_790536, EPI\_ISL\_790537, EPI\_ISL\_790538, EPI\_ISL\_790539, EPI\_ISL\_790540, EPI\_ISL\_790541, EPI\_ISL\_790542, EPI\_ISL\_790543, EPI\_ISL\_790544, EPI\_ISL\_790545, EPI\_ISL\_790546, EPI\_ISL\_790547, EPI\_ISL\_790548, EPI\_ISL\_790549, EPI\_ISL\_790550, EPI\_ISL\_790551, EPI\_ISL\_790552, EPI\_ISL\_790553, EPI\_ISL\_790554, EPI\_ISL\_790555, EPI\_ISL\_790556, EPI\_ISL\_790557, EPI\_ISL\_790558, EPI\_ISL\_790559, EPI\_ISL\_790560, EPI\_ISL\_790561, EPI\_ISL\_790562, EPI\_ISL\_790563, EPI\_ISL\_790564, EPI\_ISL\_790565, EPI\_ISL\_790566

see above

Houston Methodist Hospital

Houston Methodist Hospital

S. Wesley Long, Randall J. Olsen, Paul A. Christensen, David W. Bernard, James J. Davis, Maulik Shukla, Marcus Nguyen, Matthew Ojeda Saavedra, Prasanti Yerramilli, Layne Pruitt, Sishir Subedi, Heather Hendrickson, and James M. Musser
